# Supplementary material for: Employment Industry and Occupational Class in Relation to Serious Psychological Distress in the United States
Source: MDPI journal article supplement (doi:10.3390/ijerph19148376), 2022-07-08
Supplement: s1 [file s1]

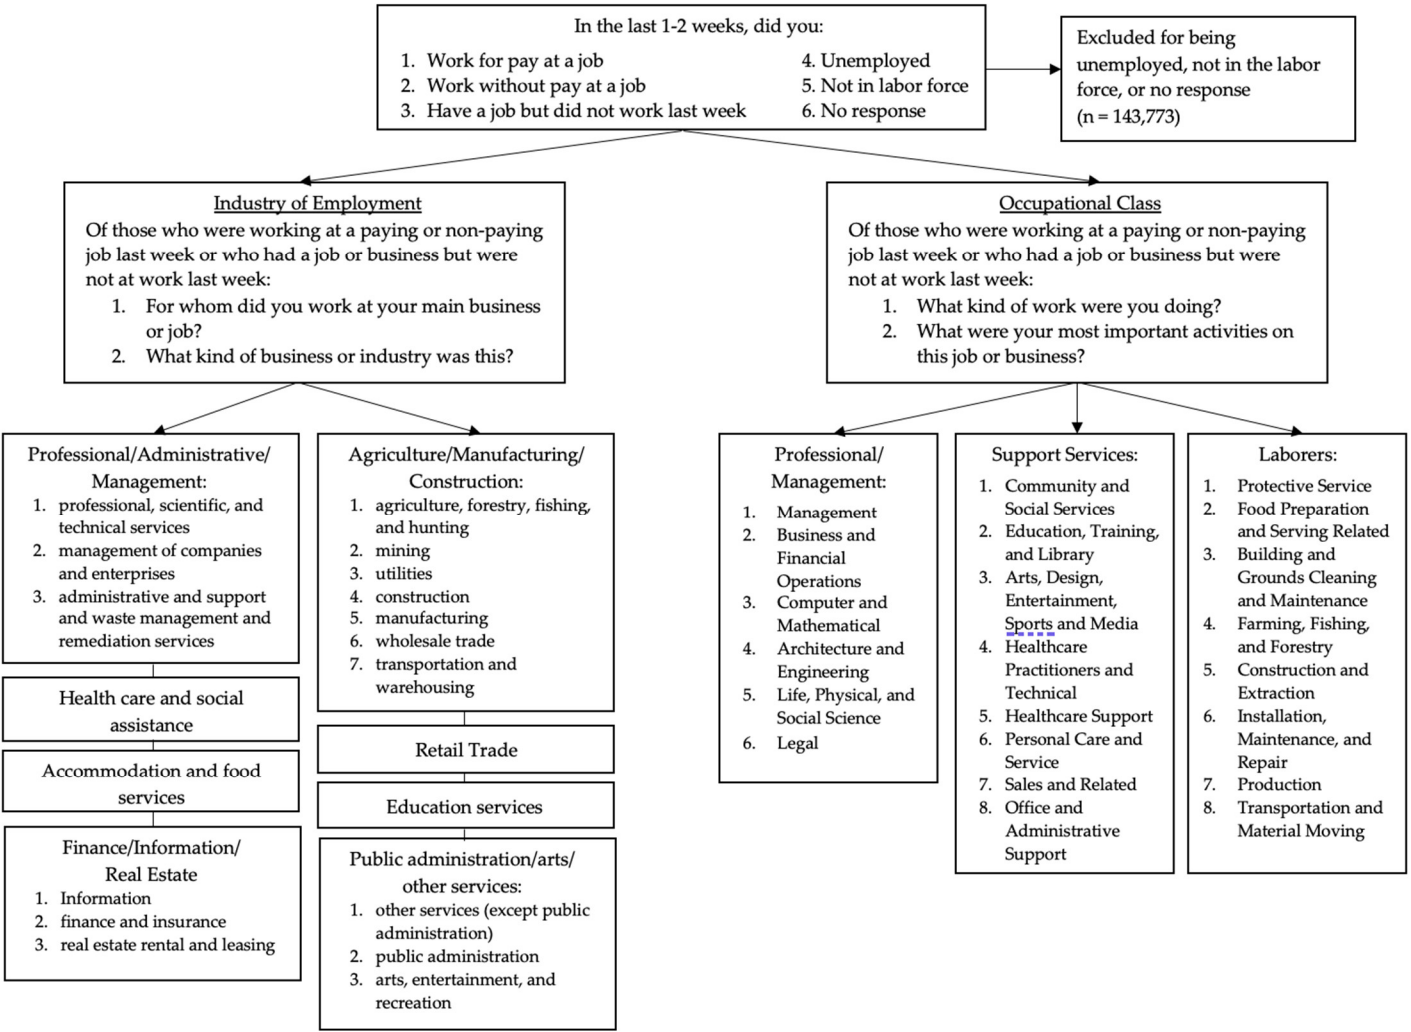

**Figure S1.** Breakdown of Occupation Data into Occupational Classes and Industries of Employment.

**Table S1.** Age-Standardized <sup>a</sup> Occupational Class and Industry of Employment Characteristics among U.S. Adults Overall, by Race/Ethnicity, and stratified by Serious Psychological Distress (SPD), National Health Interview Survey, 2004-2018, (N=245,038).

|                                                             | Race/Ethnicity      |                       |                      |                        |                       |                      |                               |                       |                      |                  |                        |                        | Total<br>(N=245,038) |                        |                        |
|-------------------------------------------------------------|---------------------|-----------------------|----------------------|------------------------|-----------------------|----------------------|-------------------------------|-----------------------|----------------------|------------------|------------------------|------------------------|----------------------|------------------------|------------------------|
|                                                             | Asian<br>(N=13,488) |                       |                      | NH-Black<br>(N=32,164) |                       |                      | Hispanic/Latinx<br>(N=43,268) |                       |                      |                  |                        |                        |                      |                        |                        |
|                                                             | All<br>N=13,488     | No<br>SPD<br>N=13,329 | With<br>SPD<br>N=159 | All<br>N=32,164        | No<br>SPD<br>N=31,514 | With<br>SPD<br>N=650 | All<br>N=43,268               | No<br>SPD<br>N=42,269 | With<br>SPD<br>N=999 | All<br>N=156,118 | No<br>SPD<br>N=153,320 | With<br>SPD<br>N=2,798 | All<br>N=245,038     | No<br>SPD<br>N=240,432 | With<br>SPD<br>N=4,606 |
| SPD <sup>b</sup> (% yes)                                    | 1.0                 |                       |                      | 1.6                    |                       |                      | 2.1                           |                       |                      | 1.4              |                        |                        | 1.5                  |                        |                        |
| <b>Industry of Employment</b>                               |                     |                       |                      |                        |                       |                      |                               |                       |                      |                  |                        |                        |                      |                        |                        |
| Professional/Administrative/<br>Management <sup>c</sup> (%) | 14.8                | 14.8                  | 17.2                 | 9.9                    | 9.9                   | 10.6                 | 10.9                          | 10.9                  | 12.2                 | 11.7             | 11.7                   | 10.8                   | 11.6                 | 11.6                   | 11.3                   |
| Agriculture/Manufacturing/<br>Construction <sup>d</sup> (%) | 23.6                | 23.7                  | 13.2                 | 22.3                   | 22.3                  | 20.5                 | 32.7                          | 32.9                  | 19.9                 | 27.1             | 27.2                   | 23.4                   | 27.2                 | 27.3                   | 22.2                   |
| Retail Trade (%)                                            | 8.9                 | 8.8                   | 15.0                 | 8.4                    | 8.4                   | 13.1                 | 9.6                           | 9.4                   | 14.9                 | 10.7             | 10.7                   | 14.5                   | 10.3                 | 10.3                   | 14.3                   |
| Finance/Information/Real Estate <sup>e</sup> (%)            | 9.6                 | 9.6                   | 10.2                 | 7.1                    | 7.1                   | 5.1                  | 6.4                           | 6.5                   | 4.6                  | 9.9              | 10.0                   | 6.1                    | 9.3                  | 9.3                    | 6.0                    |
| Educational services (%)                                    | 8.3                 | 8.3                   | 6.4                  | 10.5                   | 10.5                  | 7.4                  | 7.0                           | 7.0                   | 7.5                  | 10.7             | 10.8                   | 8.7                    | 10.1                 | 10.1                   | 8.2                    |
| Health care/Social assistance (%)                           | 16.1                | 16.0                  | 20.2                 | 21.0                   | 20.9                  | 28.1                 | 12.3                          | 12.2                  | 16.9                 | 12.8             | 12.8                   | 15.5                   | 13.6                 | 13.5                   | 17.2                   |
| Accommodation/Food services (%)                             | 6.9                 | 6.9                   | 3.9                  | 5.4                    | 5.3                   | 7.1                  | 8.3                           | 8.2                   | 11.1                 | 4.2              | 4.1                    | 7.7                    | 5.0                  | 4.9                    | 8.0                    |
| Public administration/Arts/Other services (%)               | 11.8                | 11.8                  | 14.1                 | 15.4                   | 15.5                  | 8.1                  | 12.8                          | 12.8                  | 12.9                 | 12.8             | 12.8                   | 13.3                   | 13.0                 | 13.0                   | 12.8                   |
| <b>Occupational Class</b>                                   |                     |                       |                      |                        |                       |                      |                               |                       |                      |                  |                        |                        |                      |                        |                        |
| Professional/Management (%)                                 | 35.2                | 35.4                  | 24.1                 | 14.5                   | 14.6                  | 8.0                  | 11.6                          | 11.7                  | 8.5                  | 24.8             | 25.0                   | 13.9                   | 22.2                 | 22.3                   | 12.5                   |
| Support services (%)                                        | 44.0                | 43.9                  | 52.4                 | 49.2                   | 49.2                  | 52.6                 | 34.8                          | 34.7                  | 40.6                 | 46.3             | 46.3                   | 49.3                   | 44.8                 | 44.7                   | 48.1                   |
| Laborers (%)                                                | 20.7                | 20.7                  | 23.5                 | 36.2                   | 36.2                  | 39.4                 | 53.6                          | 53.7                  | 50.9                 | 28.8             | 28.7                   | 36.8                   | 33.1                 | 32.9                   | 39.4                   |
| <b>Professional/Administrative/<br/>Management</b>          |                     |                       |                      |                        |                       |                      |                               |                       |                      |                  |                        |                        |                      |                        |                        |
| Professional/Management (%)                                 | 77.1                | 77.1                  | 71.5                 | 29.1                   | 29.4                  | 14.7                 | 22.4                          | 22.5                  | 19.9                 | 54.2             | 54.6                   | 30.6                   | 48.8                 | 49.1                   | 27.7                   |
| Support services (%)                                        | 15.5                | 15.6                  | 7.9                  | 30.5                   | 30.3                  | 39.2                 | 18.7                          | 18.6                  | 21.7                 | 27.3             | 27.2                   | 34.6                   | 25.4                 | 25.3                   | 31.8                   |
| Laborers (%)                                                | 7.4                 | 7.3                   | 20.7                 | 40.4                   | 40.3                  | 46.1                 | 58.9                          | 58.9                  | 58.4                 | 18.5             | 18.2                   | 34.8                   | 25.8                 | 25.5                   | 40.5                   |
| <b>Agriculture/Manufacturing/Con<br/>struction</b>          |                     |                       |                      |                        |                       |                      |                               |                       |                      |                  |                        |                        |                      |                        |                        |
| Professional/Management (%)                                 | 36.4                | 36.4                  | 40.7                 | 10.7                   | 10.7                  | 10.0                 | 9.0                           | 9.1                   | 7.6                  | 25.8             | 25.9                   | 14.5                   | 21.7                 | 21.8                   | 13.3                   |
| Support services (%)                                        | 20.2                | 20.3                  | 6.0                  | 19.5                   | 19.4                  | 22.7                 | 12.1                          | 12.1                  | 15.4                 | 19.9             | 19.8                   | 20.9                   | 18.4                 | 18.3                   | 19.5                   |
| Laborers (%)                                                | 43.4                | 43.3                  | 53.4                 | 69.8                   | 69.9                  | 67.3                 | 78.9                          | 78.9                  | 77.0                 | 54.4             | 54.2                   | 64.6                   | 60.0                 | 59.9                   | 67.2                   |
| <b>Retail Trade</b>                                         |                     |                       |                      |                        |                       |                      |                               |                       |                      |                  |                        |                        |                      |                        |                        |
| Professional/Management (%)                                 | 10.5                | 10.7                  | 0.0                  | 4.5                    | 4.5                   | 2.4                  | 4.0                           | 3.9                   | 7.2                  | 7.2              | 7.3                    | 4.3                    | 6.6                  | 6.6                    | 4.4                    |
| Support services (%)                                        | 77.1                | 77.0                  | 80.6                 | 75.5                   | 75.4                  | 80.7                 | 72.4                          | 72.6                  | 61.4                 | 75.5             | 75.4                   | 77.9                   | 75.1                 | 75.1                   | 75.7                   |
| Laborers (%)                                                | 12.4                | 12.3                  | 19.4                 | 20.0                   | 20.1                  | 16.9                 | 23.7                          | 23.5                  | 31.4                 | 17.3             | 17.3                   | 17.8                   | 18.3                 | 18.3                   | 19.9                   |
| <b>Finance/Information/Real Estate</b>                      |                     |                       |                      |                        |                       |                      |                               |                       |                      |                  |                        |                        |                      |                        |                        |

|                                                       |      |      |      |      |      |      |      |      |      |      |      |      |      |      |      |
|-------------------------------------------------------|------|------|------|------|------|------|------|------|------|------|------|------|------|------|------|
| Professional/Management (%)                           | 54.4 | 54.4 | 49.8 | 35.8 | 35.8 | 36   | 31.4 | 31.7 | 17.1 | 42.8 | 42.9 | 32.9 | 41.6 | 41.7 | 30.9 |
| Support services (%)                                  | 41.4 | 41.4 | 50.2 | 50.2 | 50.2 | 50.2 | 49.5 | 49.3 | 61.9 | 49.2 | 49.1 | 57.3 | 48.9 | 48.8 | 57.3 |
| Laborers (%)                                          | 4.2  | 4.2  | 0.0  | 14.0 | 14.0 | 13.8 | 19.0 | 19.0 | 21.0 | 8.0  | 7.9  | 9.8  | 9.5  | 9.5  | 11.8 |
| <b>Educational services</b>                           |      |      |      |      |      |      |      |      |      |      |      |      |      |      |      |
| Professional/Management (%)                           | 20.1 | 20.3 | 4.2  | 11.6 | 11.7 | 1.1  | 10.6 | 10.5 | 10.8 | 12.7 | 12.8 | 11.3 | 12.7 | 12.8 | 9.8  |
| Support services (%)                                  | 71.1 | 71.0 | 84.3 | 66.8 | 66.9 | 61.3 | 70.3 | 70.2 | 78.6 | 77.2 | 77.2 | 70.1 | 75.1 | 75.2 | 71.0 |
| Laborers (%)                                          | 8.8  | 8.7  | 11.5 | 21.6 | 21.4 | 37.6 | 19.1 | 19.3 | 10.6 | 10.1 | 10.0 | 18.6 | 12.1 | 12.0 | 19.2 |
| <b>Health care/Social assistance</b>                  |      |      |      |      |      |      |      |      |      |      |      |      |      |      |      |
| Professional/Management (%)                           | 12.7 | 12.7 | 7.2  | 7.3  | 7.4  | 1.9  | 7.4  | 7.6  | 2.4  | 12.3 | 12.4 | 5.1  | 10.9 | 11.0 | 4.2  |
| Support services (%)                                  | 83.3 | 83.2 | 87.2 | 82.1 | 82.0 | 83.5 | 82.6 | 82.4 | 90.5 | 82   | 81.9 | 84.4 | 82.1 | 82.1 | 85.5 |
| Laborers (%)                                          | 4.1  | 4.1  | 5.6  | 10.6 | 10.6 | 14.6 | 9.9  | 10.0 | 7.2  | 5.8  | 5.7  | 10.5 | 7.0  | 6.9  | 10.3 |
| <b>Accommodation/Food services</b>                    |      |      |      |      |      |      |      |      |      |      |      |      |      |      |      |
| Professional/Management (%)                           | 19.1 | 18.9 | 40.9 | 10.3 | 10.5 | 4.7  | 8.5  | 8.6  | 4.5  | 17.5 | 17.8 | 10.2 | 14.5 | 14.6 | 8.8  |
| Support services (%)                                  | 15.4 | 15.5 | 0.0  | 17.8 | 17.8 | 18.1 | 12.0 | 12.1 | 10.4 | 12.0 | 11.9 | 14   | 12.9 | 12.9 | 13.4 |
| Laborers (%)                                          | 65.5 | 65.6 | 59.1 | 71.9 | 71.8 | 77.3 | 79.5 | 79.3 | 85.1 | 70.5 | 70.3 | 75.8 | 72.6 | 72.5 | 77.8 |
| <b>Public administration/<br/>Arts/Other services</b> |      |      |      |      |      |      |      |      |      |      |      |      |      |      |      |
| Professional/Management (%)                           | 25.4 | 25.5 | 17.7 | 20.1 | 20.2 | 12.1 | 11.0 | 11.1 | 6.3  | 22.9 | 23.0 | 12.7 | 20.9 | 21.0 | 11.6 |
| Support services (%)                                  | 54.8 | 54.8 | 56.8 | 46.4 | 46.3 | 52.4 | 36.4 | 36.6 | 30.7 | 45.9 | 45.8 | 57.3 | 45.0 | 44.9 | 51.7 |
| Laborers (%)                                          | 19.8 | 19.7 | 25.5 | 33.5 | 33.5 | 35.4 | 52.6 | 52.4 | 62.9 | 31.2 | 31.2 | 29.9 | 34.1 | 34.0 | 36.6 |

Abbreviations: kg=kilograms; m=meters; NH=non-Hispanic; PA=physical activity; SE=standard error; SPD=serious psychological distress

<sup>a</sup> All estimates are weighted for the survey's complex sampling design. All estimates are age-standardized to the U.S. 2010 population. Percentages may not sum to 100 due to missing values or rounding.

<sup>b</sup> Kessler-6 psychological distress scale score  $\geq 13$

<sup>c</sup> Includes the following NAICS (NAICS Association, LLC, Rockaway, New Jersey) industry categories: information; finance and insurance; and real estate rental and leasing.

<sup>d</sup> Includes the following NAICS industry categories: agriculture, forestry, fishing, and hunting; mining; utilities; construction; manufacturing; wholesale trade; and transportation and warehousing.

<sup>e</sup> Includes the following NAICS industry categories: professional, scientific, and technical services; management of companies and enterprises; and administrative support and waste management and remediation services industries.

<sup>f</sup> Includes the following NAICS industry categories: public administration; arts, entertainment, and recreation; and other services (except public administration).

**Table S2.** Adjusted Prevalence Ratios (95% Confidence Intervals) for the Association Between Occupational Class (compared to Professional/Management positions) and Industry of Employment (compared to the Professional/Administrative/Management Industry) and Serious Psychological Distress, Stratified by Race/Ethnicity and Gender, National Health Interview Survey, 2004-2018 (N=245,038).

|                                               | Race/Ethnicity        |                                     |                                     |                       |                                     |                                     |                                     |                                     |
|-----------------------------------------------|-----------------------|-------------------------------------|-------------------------------------|-----------------------|-------------------------------------|-------------------------------------|-------------------------------------|-------------------------------------|
|                                               | Asian                 |                                     | NH-Black                            |                       | Hispanic/Latinx                     |                                     | NH-White                            |                                     |
| Gender                                        | Women<br>(N=6,413)    | Men<br>(N=7,075)                    | Women<br>(N=18,955)                 | Men<br>(N=13,209)     | Women<br>(N=20,308)                 | Men<br>(N=22,960)                   | Women<br>(N=77,958)                 | Men<br>(N=78,160)                   |
| <b>Occupational Class <sup>a</sup></b>        |                       |                                     |                                     |                       |                                     |                                     |                                     |                                     |
| Support services                              | 1.38<br>[0.57 - 3.34] | 1.61<br>[0.63 - 4.14]               | 1.32<br>[0.81 - 2.15]               | 1.14<br>[0.62 - 2.10] | 1.05<br>[0.71 - 1.57]               | 1.72<br>[0.98 - 3.03]               | <b>1.25</b><br><b>[1.02 - 1.53]</b> | 1.15<br>[0.89 - 1.50]               |
| Laborers                                      | 1.46<br>[0.58 - 3.64] | 1.15<br>[0.41 - 3.2]                | 1.38<br>[0.83 - 2.31]               | 1.01<br>[0.55 - 1.86] | 1.18<br>[0.76 - 1.82]               | 1.28<br>[0.71 - 2.33]               | <b>1.45</b><br><b>[1.14 - 1.85]</b> | 1.02<br>[0.80 - 1.31]               |
| <b>Industry of Employment <sup>b</sup></b>    |                       |                                     |                                     |                       |                                     |                                     |                                     |                                     |
| Manufacturing/Construction                    | 1.19<br>[0.31 - 4.58] | 1.14<br>[0.38 - 3.44]               | 0.83<br>[0.48 - 1.43]               | 0.76<br>[0.38 - 1.53] | 0.81<br>[0.54 - 1.21]               | 0.77<br>[0.47 - 1.27]               | 0.85<br>[0.65 - 1.11]               | 0.80<br>[0.63 - 1.03]               |
| Retail Trade                                  | 1.94<br>[0.63 - 6.01] | <b>4.10</b><br><b>[1.36 - 12.4]</b> | 0.65<br>[0.37 - 1.16]               | 1.38<br>[0.60 - 3.17] | 0.85<br>[0.54 - 1.35]               | 1.09<br>[0.57 - 2.09]               | 0.99<br>[0.77 - 1.28]               | 0.78<br>[0.56 - 1.08]               |
| Finance/Information/Real Estate               | 1.01<br>[0.35 - 2.95] | 0.81<br>[0.18 - 3.53]               | 0.55<br>[0.29 - 1.03]               | 0.31<br>[0.09 - 1.04] | 1.00<br>[0.56 - 1.79]               | 0.80<br>[0.36 - 1.81]               | <b>0.71</b><br><b>[0.52 - 0.97]</b> | 0.68<br>[0.46 - 1.01]               |
| Educational Services                          | 0.85<br>[0.29 - 2.46] | 3.10<br>[0.63 - 15.3]               | <b>0.56</b><br><b>[0.32 - 1.00]</b> | 0.93<br>[0.30 - 2.84] | 0.69<br>[0.40 - 1.20]               | 1.06<br>[0.41 - 2.78]               | <b>0.66</b><br><b>[0.49 - 0.89]</b> | 1.20<br>[0.82 - 1.76]               |
| Healthcare/Social Assistance                  | 1.36<br>[0.48 - 3.85] | 2.79<br>[0.64 - 12.3]               | <b>0.57</b><br><b>[0.35 - 0.92]</b> | 1.31<br>[0.57 - 3.01] | 0.93<br>[0.63 - 1.36]               | <b>2.15</b><br><b>[1.04 - 4.44]</b> | 0.89<br>[0.71 - 1.13]               | 0.92<br>[0.60 - 1.41]               |
| Accommodation/Food services                   | 0.30<br>[0.09 - 1.00] | 0.48<br>[0.11 - 2.07]               | 0.62<br>[0.33 - 1.17]               | 1.02<br>[0.42 - 2.50] | 1.16<br>[0.77 - 1.76]               | 0.60<br>[0.31 - 1.14]               | 1.15<br>[0.88 - 1.52]               | 0.79<br>[0.54 - 1.14]               |
| Public Administration/Arts/Other services     | 1.06<br>[0.37 - 3.01] | 2.20<br>[0.68 - 7.19]               | <b>0.39</b><br><b>[0.21 - 0.73]</b> | 0.86<br>[0.42 - 1.74] | 0.72<br>[0.46 - 1.11]               | 0.90<br>[0.41 - 1.96]               | 0.90<br>[0.70 - 1.16]               | <b>0.69</b><br><b>[0.51 - 0.94]</b> |
| <b>Professional/Administrative/Management</b> |                       |                                     |                                     |                       |                                     |                                     |                                     |                                     |
| Support services                              | NE                    | NE                                  | 1.11<br>[0.30 - 4.07]               | NE                    | 0.89<br>[0.37 - 2.15]               | 1.68<br>[0.46 - 6.10]               | 1.16<br>[0.68 - 1.97]               | <b>2.04</b><br><b>[1.22 - 3.40]</b> |
| Laborers                                      | NE                    | NE                                  | 0.93<br>[0.20 - 4.28]               | NE                    | 1.02<br>[0.40 - 2.57]               | 1.00<br>[0.22 - 4.62]               | 1.26<br>[0.70 - 2.26]               | <b>1.91</b><br><b>[1.18 - 3.11]</b> |
| <b>Manufacturing/Construction</b>             |                       |                                     |                                     |                       |                                     |                                     |                                     |                                     |
| Support services                              | NE                    | NE                                  | 1.45<br>[0.26 - 8.23]               | 0.62<br>[0.18 - 2.11] | 0.88<br>[0.31 - 2.53]               | 1.24<br>[0.48 - 3.23]               | 1.31<br>[0.80 - 2.14]               | 1.08<br>[0.57 - 2.06]               |
| Laborers                                      | NE                    | NE                                  | 1.42<br>[0.23 - 8.93]               | 0.79<br>[0.27 - 2.34] | 0.80<br>[0.38 - 1.69]               | 0.99<br>[0.43 - 2.32]               | 1.56<br>[0.98 - 2.49]               | 1.06<br>[0.68 - 1.65]               |
| <b>Retail Trade</b>                           |                       |                                     |                                     |                       |                                     |                                     |                                     |                                     |
| Support services                              | NE                    | NE                                  | 3.78<br>[0.43 - 33.5]               | 0.46<br>[0.05 - 4.68] | <b>0.22</b><br><b>[0.06 - 0.78]</b> | NE                                  | 2.16<br>[0.92 - 5.03]               | 0.76<br>[0.29 - 1.99]               |
| Laborers                                      | NE                    | NE                                  | 3.26<br>[0.31 - 34.4]               | 0.39<br>[0.04 - 3.98] | 0.52<br>[0.14 - 1.92]               | NE                                  | 1.97<br>[0.7 - 5.52]                | 0.77<br>[0.26 - 2.29]               |

|                                           |    |                       |                       |                       |                       |                       |                                     |                       |
|-------------------------------------------|----|-----------------------|-----------------------|-----------------------|-----------------------|-----------------------|-------------------------------------|-----------------------|
| Finance/Information/Real Estate           |    |                       |                       |                       |                       |                       |                                     |                       |
| Support services                          | NE | NE                    | 0.52<br>[0.17 - 1.54] | NE                    | 1.49<br>[0.51 - 4.36] | NE                    | 0.93<br>[0.54 - 1.63]               | 0.66<br>[0.30 - 1.43] |
| Laborers                                  | NE | NE                    | 0.46<br>[0.06 - 3.32] | NE                    | 0.58<br>[0.08 - 4.12] | NE                    | 0.40<br>[0.10 - 1.57]               | 1.09<br>[0.46 - 2.56] |
| Educational Services                      |    |                       |                       |                       |                       |                       |                                     |                       |
| Support services                          | NE | NE                    | NE                    | NE                    | 0.38<br>[0.09 - 1.60] | 0.50<br>[0.07 - 3.43] | 0.93<br>[0.42 - 2.04]               | 1.54<br>[0.61 - 3.86] |
| Laborers                                  | NE | NE                    | NE                    | NE                    | 0.14<br>[0.02 - 1.17] | 0.26<br>[0.03 - 2.42] | 1.36<br>[0.50 - 3.73]               | 0.59<br>[0.20 - 1.79] |
| Health Care/Social Assistance             |    |                       |                       |                       |                       |                       |                                     |                       |
| Support services                          | NE | NE                    | 1.62<br>[0.40 - 6.62] | NE                    | 2.13<br>[0.64 - 7.12] | 6.26<br>[0.51 - 77.5] | 2.22<br>[0.87 - 5.70]               | 0.76<br>[0.30 - 1.94] |
| Laborers                                  | NE | NE                    | 1.27<br>[0.26 - 6.27] | NE                    | 1.38<br>[0.31 - 6.15] | 1.95<br>[0.10 - 39.6] | 2.49<br>[0.90 - 6.93]               | 0.31<br>[0.08 - 1.16] |
| Accommodation/Food Services               |    |                       |                       |                       |                       |                       |                                     |                       |
| Support services                          | NE | NE                    | 1.88<br>[0.36 - 9.82] | NE                    | 0.89<br>[0.26 - 3.10] | NE                    | 2.06<br>[0.91 - 4.64]               | 0.92<br>[0.30 - 2.81] |
| Laborers                                  | NE | NE                    | 3.30<br>[0.70 - 15.5] | NE                    | 1.23<br>[0.44 - 3.43] | NE                    | <b>2.15</b><br><b>[1.00 - 4.61]</b> | 0.53<br>[0.19 - 1.44] |
| Public Administration/Arts/Other Services |    |                       |                       |                       |                       |                       |                                     |                       |
| Support services                          | NE | 0.49<br>[0.07 - 3.36] | 3.00<br>[0.76 - 11.8] | 0.64<br>[0.20 - 2.07] | 1.31<br>[0.26 - 6.6]  | 0.41<br>[0.05 - 3.38] | 1.24<br>[0.74 - 2.09]               | 1.34<br>[0.60 - 2.98] |
| Laborers                                  | NE | 0.53<br>[0.04 - 6.65] | 1.04<br>[0.25 - 4.37] | 0.72<br>[0.17 - 3.05] | 1.89<br>[0.35 - 10.3] | 1.30<br>[0.17 - 10.1] | 1.10<br>[0.56 - 2.16]               | 0.81<br>[0.35 - 1.88] |

Abbreviations: NH=non-Hispanic; NE=not estimable

<sup>a</sup> Reference group: professional/management positions

<sup>b</sup> Reference group: professional/administrative/management industry

All models adjusted for age (18-30, 31-49, ≥50 years), gender (women, men), educational attainment (<high school, high school graduate, some college, ≥college), annual household income (<\$35,000, \$35,000-\$74,999, \$75,000+), region of residence (Northeast, Midwest, South, West), marital/co-habiting status (married/living with partner or cohabitating, divorced/widowed/separated, single/no live-in partner), health status (excellent/very good, good, fair/poor), alcohol consumption (never, former, current), and “ideal” cardiovascular health (never smoking/quit >12 months prior to interview, BMI 18.5- <25 kg/m, meeting physical activity guidelines, and no prior diagnosis of dyslipidemia, hypertension, or diabetes/prediabetes).

All estimates are weighted for the survey’s complex sampling design. Boldface indicates statistically significant results at the 0.05 level

Overall models adjusted for race/ethnicity (NH-White, NH-Black, Hispanic/Latinx, and Asian).

**Table S3.** Adjusted Prevalence Ratios (95% Confidence Intervals) for the Association Between Occupational Class (compared to Professional/Management positions) and Industry of Employment (compared to the Professional/Administrative/Management Industry) and Serious Psychological Distress, Stratified by Race/Ethnicity and Age, National Health Interview Survey, 2004-2018, (N=245,038).

|                                               | Race/Ethnicity                      |                        |                                     |                                     |                         |                                     |                                     |                         |
|-----------------------------------------------|-------------------------------------|------------------------|-------------------------------------|-------------------------------------|-------------------------|-------------------------------------|-------------------------------------|-------------------------|
|                                               | Asian                               |                        | NH-Black                            |                                     | Hispanic/Latinx         |                                     | NH-White                            |                         |
| Age                                           | <50 years<br>(N=9,901)              | ≥50 years<br>(N=3,587) | <50 years<br>(N=22,463)             | ≥50 years<br>(N=9,701)              | <50 years<br>(N=34,440) | ≥50 years<br>(N=8,828)              | <50 years<br>(N=97,407)             | ≥50 years<br>(N=58,711) |
| <b>Occupational Class <sup>a</sup></b>        |                                     |                        |                                     |                                     |                         |                                     |                                     |                         |
| Support services                              | 1.21<br>[0.57 - 2.53]               | 5.09<br>[0.95 - 27.3]  | 1.16<br>[0.74 - 1.79]               | 1.49<br>[0.68 - 3.25]               | 1.08<br>[0.77 - 1.53]   | 2.21<br>[0.87 - 5.61]               | <b>1.24</b><br><b>[1.02 - 1.50]</b> | 0.99<br>[0.75 - 1.31]   |
| Laborers                                      | 1.13<br>[0.5 - 2.52]                | 3.63<br>[0.77 - 17.1]  | 1.10<br>[0.69 - 1.75]               | 1.51<br>[0.65 - 3.51]               | 1.03<br>[0.71 - 1.50]   | <b>2.70</b><br><b>[1.03 - 7.06]</b> | <b>1.24</b><br><b>[1.00 - 1.55]</b> | 1.07<br>[0.82 - 1.40]   |
|                                               |                                     |                        |                                     |                                     |                         |                                     |                                     |                         |
| <b>Industry of Employment <sup>b</sup></b>    |                                     |                        |                                     |                                     |                         |                                     |                                     |                         |
| Manufacturing/Construction                    | 1.59<br>[0.69 - 3.68]               | 0.39<br>[0.09 - 1.63]  | 0.73<br>[0.44 - 1.2]                | 0.75<br>[0.32 - 1.73]               | 0.91<br>[0.64 - 1.31]   | <b>0.44</b><br><b>[0.22 - 0.87]</b> | 0.83<br>[0.66 - 1.05]               | 0.85<br>[0.61 - 1.17]   |
| Retail Trade                                  | <b>3.07</b><br><b>[1.31 - 7.16]</b> | 1.92<br>[0.43 - 8.63]  | 0.85<br>[0.49 - 1.47]               | 1.09<br>[0.40 - 3.00]               | 0.96<br>[0.63 - 1.45]   | 0.76<br>[0.32 - 1.82]               | 0.94<br>[0.75 - 1.19]               | 0.78<br>[0.54 - 1.13]   |
| Finance/Information/Real Estate               | 1.31<br>[0.54 - 3.14]               | 0.39<br>[0.06 - 2.59]  | <b>0.49</b><br><b>[0.26 - 0.93]</b> | 0.64<br>[0.21 - 1.92]               | 1.17<br>[0.69 - 1.98]   | <b>0.33</b><br><b>[0.13 - 0.79]</b> | <b>0.65</b><br><b>[0.48 - 0.87]</b> | 0.84<br>[0.54 - 1.31]   |
| Educational Services                          | 1.77<br>[0.57 - 5.43]               | 0.95<br>[0.2 - 4.55]   | 0.83<br>[0.45 - 1.54]               | <b>0.34</b><br><b>[0.13 - 0.93]</b> | 0.82<br>[0.47 - 1.43]   | 0.54<br>[0.23 - 1.29]               | <b>0.73</b><br><b>[0.54 - 0.97]</b> | 0.91<br>[0.60 - 1.39]   |
| Healthcare/Social Assistance                  | 1.45<br>[0.63 - 3.37]               | 2.12<br>[0.35 - 12.8]  | 0.70<br>[0.43 - 1.15]               | 0.75<br>[0.30 - 1.85]               | 1.26<br>[0.87 - 1.83]   | 0.57<br>[0.29 - 1.11]               | <b>0.78</b><br><b>[0.61 - 0.98]</b> | 1.11<br>[0.78 - 1.59]   |
| Accommodation/Food services                   | 0.36<br>[0.13 - 1.00]               | 0.32<br>[0.04 - 2.31]  | 0.82<br>[0.46 - 1.44]               | 0.62<br>[0.20 - 1.96]               | 1.11<br>[0.76 - 1.61]   | 0.49<br>[0.16 - 1.47]               | 1.05<br>[0.82 - 1.36]               | 0.77<br>[0.47 - 1.25]   |
| Public Administration/Arts/Other services     | 1.73<br>[0.78 - 3.85]               | 0.80<br>[0.18 - 3.62]  | 0.65<br>[0.39 - 1.09]               | <b>0.32</b><br><b>[0.12 - 0.84]</b> | 0.93<br>[0.59 - 1.47]   | <b>0.42</b><br><b>[0.19 - 0.93]</b> | 0.84<br>[0.66 - 1.07]               | 0.72<br>[0.50 - 1.05]   |
|                                               |                                     |                        |                                     |                                     |                         |                                     |                                     |                         |
| <b>Professional/Administrative/Management</b> |                                     |                        |                                     |                                     |                         |                                     |                                     |                         |
| Support services                              | NE                                  | NE                     | 1.36<br>[0.46 - 4.04]               | 2.74 *<br>[0.36 - 20.7]             | 0.94<br>[0.41 - 2.15]   | 2.11 *<br>[0.32 - 13.8]             | <b>1.89</b><br><b>[1.24 - 2.89]</b> | 0.79<br>[0.36 - 1.71]   |
| Laborers                                      | NE                                  | NE                     | 1.06<br>[0.35 - 3.20]               | 3.09 *<br>[0.43 - 22.2]             | 1.12<br>[0.38 - 3.26]   | 1.03 *<br>[0.17 - 6.35]             | 1.55<br>[0.96 - 2.48]               | 1.43<br>[0.70 - 2.93]   |
| <b>Manufacturing/Construction</b>             |                                     |                        |                                     |                                     |                         |                                     |                                     |                         |
| Support services                              | 0.22<br>[0.04 - 1.33]               | NE                     | 1.03<br>[0.33 - 3.18]               | 1.09 *<br>[0.21 - 5.61]             | 0.76<br>[0.33 - 1.78]   | 8.06<br>[0.95 - 68.4]               | 1.30<br>[0.75 - 2.25]               | 0.84<br>[0.50 - 1.43]   |
| Laborers                                      | 0.58<br>[0.14 - 2.51]               | NE                     | 1.18<br>[0.34 - 4.12]               | 0.78<br>[0.18 - 3.42]               | 0.70<br>[0.37 - 1.34]   | 4.76<br>[0.64 - 35.5]               | 1.33<br>[0.85 - 2.10]               | 0.98<br>[0.63 - 1.54]   |
| <b>Retail Trade</b>                           |                                     |                        |                                     |                                     |                         |                                     |                                     |                         |
| Support services                              | NE                                  | NE                     | 1.25<br>[0.15 - 10.0]               | 1.10 *<br>[0.04 - 27.5]             | 1.47<br>[0.17 - 12.8]   | 0.18<br>[0.03 - 1.17]               | 1.87<br>[0.89 - 3.91]               | 0.60<br>[0.19 - 1.88]   |
| Laborers                                      | NE                                  | NE                     | 1.17<br>[0.12 - 10.9]               | 0.84 *<br>[0.02 - 41.8]             | 1.72<br>[0.19 - 15.5]   | 1.45<br>[0.16 - 13.4]               | 1.80<br>[0.77 - 4.22]               | 0.63<br>[0.17 - 2.28]   |
| <b>Finance/Information/Real Estate</b>        |                                     |                        |                                     |                                     |                         |                                     |                                     |                         |
| Support services                              | NE                                  | NE                     | 0.55 *<br>[0.16 - 1.84]             | NE                                  | 1.80<br>[0.73 - 4.45]   | NE                                  | 1.08<br>[0.65 - 1.81]               | 0.60<br>[0.28 - 1.29]   |

|                                                  |                         |                         |                         |                         |                                     |                         |                       |                         |
|--------------------------------------------------|-------------------------|-------------------------|-------------------------|-------------------------|-------------------------------------|-------------------------|-----------------------|-------------------------|
| Laborers                                         | NE                      | NE                      | 0.73 *<br>[0.13 - 4.26] | NE                      | 1.63<br>[0.54 - 4.96]               | NE                      | 0.77<br>[0.29 - 2.07] | 0.77<br>[0.29 - 2.01]   |
| <b>Educational Services</b>                      |                         |                         |                         |                         |                                     |                         |                       |                         |
| Support services                                 | NE                      | NE                      | 7.34<br>[0.85 - 63.1]   | NE                      | 0.37<br>[0.09 - 1.58]               | NE                      | 0.91<br>[0.44 - 1.85] | 1.88<br>[0.62 - 5.72]   |
| Laborers                                         | NE                      | NE                      | 6.67<br>[0.60 - 73.7]   | NE                      | <b>0.11</b><br><b>[0.02 - 0.66]</b> | NE                      | 0.58<br>[0.24 - 1.38] | 3.19<br>[0.97 - 10.5]   |
| <b>Health Care/Social Assistance</b>             |                         |                         |                         |                         |                                     |                         |                       |                         |
| Support services                                 | 0.50<br>[0.05 - 5.30]   | NE                      | 1.92<br>[0.46 - 8.13]   | NE                      | 2.58<br>[0.70 - 9.46]               | 4.28 *<br>[0.51 - 36.1] | 1.48<br>[0.61 - 3.57] | 1.59<br>[0.72 - 3.49]   |
| Laborers                                         | 2.38<br>[0.09 - 61.1]   | NE                      | 1.60<br>[0.35 - 7.37]   | NE                      | 1.35<br>[0.26 - 6.91]               | 1.98 *<br>[0.21 - 18.9] | 1.13<br>[0.40 - 3.18] | 1.70<br>[0.62 - 4.64]   |
| <b>Accommodation/Food Services</b>               |                         |                         |                         |                         |                                     |                         |                       |                         |
| Support services                                 | NE                      | NE                      | 2.16<br>[0.43 - 10.8]   | NE                      | 0.70<br>[0.22 - 2.22]               | NE                      | 1.37<br>[0.71 - 2.63] | 2.63 *<br>[0.52 - 13.3] |
| Laborers                                         | NE                      | NE                      | 2.68<br>[0.65 - 11.1]   | NE                      | 1.16<br>[0.49 - 2.72]               | NE                      | 1.23<br>[0.69 - 2.21] | 3.31 *<br>[0.76 - 14.4] |
| <b>Public Administration/Arts/Other Services</b> |                         |                         |                         |                         |                                     |                         |                       |                         |
| Support services                                 | 1.41 *<br>[0.45 - 4.43] | 0.07 *<br>[0.00 - 5.18] | 1.14<br>[0.45 - 2.88]   | 3.75 *<br>[0.33 - 42.2] | 1.08<br>[0.28 - 4.14]               | NE                      | 1.34<br>[0.78 - 2.30] | 0.96<br>[0.44 - 2.07]   |
| Laborers                                         | 1.51 *<br>[0.30 - 7.73] | 4.52 *<br>[0.49 - 41.5] | 0.60<br>[0.18 - 2.01]   | 5.48 *<br>[0.45 - 66.3] | 1.27<br>[0.31 - 5.21]               | NE                      | 1.06<br>[0.55 - 2.06] | 0.67<br>[0.28 - 1.61]   |

Abbreviations: NH=non-Hispanic; NE=not estimable

<sup>a</sup> Reference group: professional/management positions

<sup>b</sup> Reference group: professional/administrative/management industry

All models adjusted for age (18-30, 31-49, ≥50 years), gender (Women, Men), educational attainment (<high school, high school graduate, some college, ≥college), annual household income (<\$35,000, \$35,000-\$74,999, \$75,000+), region of residence (Northeast, Midwest, South, West), marital/co-habiting status (married/living with partner or cohabitating, divorced/widowed/separated, single/no live-in partner), health status (excellent/very good, good, fair/poor), alcohol consumption (never, former, current), and “ideal” cardiovascular health (never smoking/quit >12 months prior to interview, BMI 18.5-<25 kg/m, meeting physical activity guidelines, and no prior diagnosis of dyslipidemia, hypertension, or diabetes/prediabetes).

All estimates are weighted for the survey’s complex sampling design. Boldface indicates statistically significant results at the 0.05 level

Overall models adjusted for race/ethnicity (NH-White, NH-Black, Hispanic/Latinx, and Asian).

\*Estimates with particularly wide confidence intervals

**Table S4.** Adjusted Prevalence Ratios (95% Confidence Intervals) for the Association Between Occupational Class (compared to Professional/Management positions) and Industry of Employment (compared to the Professional/Administrative/Management Industry) and Serious Psychological Distress, Stratified by Race/Ethnicity and Annual Household Income, National Health Interview Survey, 2004-2018, (N=226,858) <sup>a</sup>.

|                                           | Race/Ethnicity         |                        |                         |                        |                         |                        |                         |                         |
|-------------------------------------------|------------------------|------------------------|-------------------------|------------------------|-------------------------|------------------------|-------------------------|-------------------------|
|                                           | Asian                  |                        | NH-Black                |                        | Hispanic/Latinx         |                        | NH-White                |                         |
| Annual Household Income                   | <\$75,000<br>(N=6,796) | ≥\$75,000<br>(N=5,573) | <\$75,000<br>(N=23,767) | ≥\$75,000<br>(N=5,948) | <\$75,000<br>(N=32,607) | ≥\$75,000<br>(N=7,643) | <\$75,000<br>(N=83,695) | ≥\$75,000<br>(N=60,829) |
| Occupational Class <sup>b</sup>           |                        |                        |                         |                        |                         |                        |                         |                         |
| Support services                          | 1.26<br>[0.63 - 2.52]  | 1.75<br>[0.69 - 4.40]  | 1.83<br>[1.15 - 2.92]   | 0.48<br>[0.22 - 1.04]  | 1.22<br>[0.85 - 1.75]   | 1.05<br>[0.53 - 2.12]  | 1.12<br>[0.92 - 1.35]   | 1.28<br>[0.96 - 1.71]   |
| Laborers                                  | 1.70<br>[0.74 - 3.91]  | 0.36<br>[0.08 - 1.59]  | 1.74<br>[1.06 - 2.85]   | 0.65<br>[0.27 - 1.58]  | 1.14<br>[0.78 - 1.68]   | 1.40<br>[0.68 - 2.88]  | 1.20<br>[0.98 - 1.47]   | 1.15<br>[0.79 - 1.69]   |
| Industry of Employment <sup>c</sup>       |                        |                        |                         |                        |                         |                        |                         |                         |
| Manufacturing/Construction                | 0.78<br>[0.31 - 1.95]  | 1.57<br>[0.43 - 5.66]  | 0.76<br>[0.47 - 1.21]   | 0.52<br>[0.19 - 1.46]  | 0.76<br>[0.54 - 1.07]   | 0.82<br>[0.27 - 2.53]  | 0.81<br>[0.66 - 0.99]   | 0.79<br>[0.53 - 1.20]   |
| Retail Trade                              | 1.76<br>[0.70 - 4.48]  | 3.13<br>[0.80 - 12.3]  | 1.07<br>[0.64 - 1.79]   | 0.29<br>[0.06 - 1.39]  | 0.85<br>[0.57 - 1.25]   | 1.13<br>[0.33 - 3.92]  | 0.90<br>[0.72 - 1.11]   | 0.91<br>[0.58 - 1.45]   |
| Finance/Information/Real Estate           | 0.64<br>[0.21 - 2.02]  | 1.81<br>[0.55 - 5.95]  | 0.55<br>[0.30 - 1.01]   | 0.31<br>[0.09 - 1.09]  | 0.75<br>[0.46 - 1.23]   | 1.58<br>[0.45 - 5.54]  | 0.69<br>[0.53 - 0.90]   | 0.67<br>[0.40 - 1.13]   |
| Educational Services                      | 0.89<br>[0.31 - 2.51]  | 2.57<br>[0.40 - 16.6]  | 0.83<br>[0.48 - 1.44]   | 0.17<br>[0.02 - 1.60]  | 0.65<br>[0.38 - 1.12]   | 1.49<br>[0.47 - 4.75]  | 0.64<br>[0.49 - 0.83]   | 1.12<br>[0.70 - 1.79]   |
| Healthcare/Social Assistance              | 0.72<br>[0.27 - 1.87]  | 4.35<br>[1.27 - 14.9]  | 0.88<br>[0.56 - 1.40]   | 0.18<br>[0.04 - 0.74]  | 1.00<br>[0.70 - 1.44]   | 1.45<br>[0.49 - 4.36]  | 0.90<br>[0.73 - 1.11]   | 0.74<br>[0.46 - 1.17]   |
| Accommodation/Food services               | 0.30<br>[0.10 - 0.91]  | 0.46<br>[0.05 - 4.37]  | 1.02<br>[0.60 - 1.73]   | NE                     | 0.98<br>[0.69 - 1.40]   | 0.41<br>[0.08 - 2.00]  | 1.01<br>[0.80 - 1.28]   | 1.26<br>[0.70 - 2.24]   |
| Public Administration/Arts/Other services | 1.23<br>[0.48 - 3.17]  | 1.19<br>[0.29 - 4.98]  | 0.61<br>[0.37 - 1.00]   | 0.34<br>[0.12 - 0.99]  | 0.64<br>[0.42 - 0.96]   | 1.65<br>[0.50 - 5.47]  | 0.82<br>[0.67 - 1.02]   | 0.71<br>[0.46 - 1.11]   |
| Professional/Administrative/Management    |                        |                        |                         |                        |                         |                        |                         |                         |
| Support services                          | NE                     | NE                     | 1.86<br>[0.61 - 5.71]   | NE                     | 1.18<br>[0.54 - 2.55]   | NE                     | 1.63<br>[1.07 - 2.49]   | 1.27<br>[0.62 - 2.62]   |
| Laborers                                  | NE                     | NE                     | 1.65<br>[0.54 - 5.04]   | NE                     | 0.92<br>[0.41 - 2.07]   | NE                     | 1.94<br>[1.25 - 3.01]   | 0.86<br>[0.30 - 2.52]   |
| Manufacturing/Construction                |                        |                        |                         |                        |                         |                        |                         |                         |
| Support services                          | NE                     | NE                     | 0.60<br>[0.19 - 1.92]   | 1.95<br>[0.54 - 7.07]  | 2.04<br>[0.87 - 4.80]   | NE                     | 0.89<br>[0.56 - 1.41]   | 1.75<br>[0.89 - 3.45]   |
| Laborers                                  | NE                     | NE                     | 0.85<br>[0.29 - 2.51]   | 0.81<br>[0.15 - 4.37]  | 1.47<br>[0.68 - 3.18]   | NE                     | 1.15<br>[0.74 - 1.78]   | 1.22<br>[0.72 - 2.09]   |
| Retail Trade                              |                        |                        |                         |                        |                         |                        |                         |                         |
| Support services                          | NE                     | NE                     | 1.07<br>[0.20 - 5.81]   | NE                     | 0.44<br>[0.13 - 1.54]   | NE                     | 1.66<br>[0.77 - 3.58]   | 0.98<br>[0.34 - 2.87]   |
| Laborers                                  | NE                     | NE                     | 0.93<br>[0.14 - 6.08]   | NE                     | 0.46<br>[0.13 - 1.72]   | NE                     | 1.63<br>[0.68 - 3.89]   | 0.87<br>[0.21 - 3.58]   |
| Finance/Information/Real Estate           |                        |                        |                         |                        |                         |                        |                         |                         |



|                               |                                      |    |                       |    |                                     |    |                       |                                     |
|-------------------------------|--------------------------------------|----|-----------------------|----|-------------------------------------|----|-----------------------|-------------------------------------|
| Support services              | NE                                   | NE | NE                    | NE | 2.08<br>[0.71 - 6.12]               | NE | 0.78<br>[0.47 - 1.29] | 1.00<br>[0.45 - 2.22]               |
| Laborers                      | NE                                   | NE | NE                    | NE | 1.96<br>[0.58 - 6.55]               | NE | 0.55<br>[0.24 - 1.29] | 1.75<br>[0.55 - 5.54]               |
| Educational Services          |                                      |    |                       |    |                                     |    |                       |                                     |
| Support services              | NE                                   | NE | 7.90<br>[0.99 - 63.1] | NE | 0.28<br>[0.08 - 1.02]               | NE | 0.82<br>[0.41 - 1.67] | 1.70<br>[0.58 - 4.96]               |
| Laborers                      | NE                                   | NE | 5.81<br>[0.59 - 57.4] | NE | <b>0.09</b><br><b>[0.02 - 0.36]</b> | NE | 1.33<br>[0.60 - 2.92] | 0.43<br>[0.08 - 2.49]               |
| Health Care/Social Assistance |                                      |    |                       |    |                                     |    |                       |                                     |
| Support services              | NE                                   | NE | 3.97<br>[0.54 - 29.1] | NE | <b>3.35</b><br><b>[1.05 - 10.7]</b> | NE | 1.16<br>[0.57 - 2.38] | <b>3.86</b><br><b>[1.21 - 12.3]</b> |
| Laborers                      | NE                                   | NE | 3.55<br>[0.46 - 27.5] | NE | 1.26<br>[0.27 - 5.79]               | NE | 1.09<br>[0.47 - 2.49] | 4.32<br>[0.79 - 23.6]               |
| Accommodation/Food Services   |                                      |    |                       |    |                                     |    |                       |                                     |
| Support services              | NE                                   | NE | 3.19<br>[0.62 - 16.3] | NE | 0.70<br>[0.24 - 2.08]               | NE | 1.42<br>[0.72 - 2.80] | 1.65<br>[0.27 - 10.0]               |
| Laborers                      | NE                                   | NE | 3.52<br>[0.82 - 15.1] | NE | 1.10<br>[0.48 - 2.51]               | NE | 1.18<br>[0.65 - 2.12] | 2.65<br>[0.52 - 13.6]               |
| Support services              | 2.82<br>[0.47 - 16.9]                | NE | 2.39<br>[0.74 - 7.70] | NE | 1.42<br>[0.46 - 4.44]               | NE | 1.31<br>[0.75 - 2.27] | 1.38<br>[0.68 - 2.81]               |
| Laborers                      | <b>10.12</b><br><b>[1.20 - 85.4]</b> | NE | 1.24<br>[0.34 - 4.56] | NE | 2.09<br>[0.61 - 7.20]               | NE | 0.94<br>[0.49 - 1.81] | 1.29<br>[0.47 - 3.55]               |

<sup>a</sup>18180 participants excluded for missing income data

<sup>b</sup>Reference group: professional/management positions

<sup>c</sup>Reference group: professional/administrative/management industry

Abbreviations: NH=non-Hispanic; NE=not estimable

All models adjusted for age (18-30, 31-49, ≥50 years), gender (Women, Men), educational attainment (<high school, high school graduate, some college, ≥college), annual household income (<\$35,000, \$35,000-\$74,999, \$75,000+), employment status (unemployed, employed), region of residence (Northeast, Midwest, South, West), marital/co-habiting status (married/living with partner or cohabitating, divorced/widowed/separated, single/no live-in partner), health status (excellent/very good, good, fair/poor), alcohol consumption (never, former, current), and “ideal” cardiovascular health (never smoking/quit >12 months prior to interview, BMI 18.5-<25 kg/m, meeting physical activity guidelines, and no prior diagnosis of dyslipidemia, hypertension, or diabetes/prediabetes).

All estimates are weighted for the survey’s complex sampling design. Boldface indicates statistically significant results at the 0.05 level

Overall models adjusted for race/ethnicity (NH-White, NH-Black, Hispanic/Latinx, and Asian).

**Table S5.** Adjusted Prevalence Ratios (95% Confidence Intervals) for the Association Between Occupational Class (compared to Professional/Management positions) and Industry of Employment (compared to the Professional/Administrative/Management Industry) and Serious Psychological Distress, Stratified by Race/Ethnicity and Self-Reported Health Status, National Health Interview Survey, 2004-2018, (N=245,038).

|                                               | Race/Ethnicity                      |                     |                                     |                     |                                     |                     |                                      |                     |
|-----------------------------------------------|-------------------------------------|---------------------|-------------------------------------|---------------------|-------------------------------------|---------------------|--------------------------------------|---------------------|
|                                               | Asian                               |                     | NH-Black                            |                     | Hispanic/Latinx                     |                     | NH-White                             |                     |
|                                               | Excellent/Very Good/Good (N=12,857) | Fair/Poor (N=628)   | Excellent/Very Good/Good (N=29,156) | Fair/Poor (N=3,002) | Excellent/Very Good/Good (N=39,535) | Fair/Poor (N=3,721) | Excellent/Very Good/Good (N=147,816) | Fair/Poor (N=8,269) |
| <b>Occupational Class <sup>a</sup></b>        |                                     |                     |                                     |                     |                                     |                     |                                      |                     |
| Support services                              | 1.61<br>[0.83-3.15]                 | 1.11<br>[0.27-4.58] | 1.09<br>[0.73-1.65]                 | 2.28<br>[0.93-5.57] | 1.19<br>[0.83-1.72]                 | 1.22<br>[0.62-2.37] | 1.12<br>[0.93-1.34]                  | 1.36<br>[0.99-1.87] |
| Laborers                                      | 1.94<br>[0.97-3.90]                 | 0.38<br>[0.07-2.04] | 1.09<br>[0.68-1.72]                 | 2.08<br>[0.81-5.31] | 1.27<br>[0.86-1.87]                 | 1.08<br>[0.53-2.22] | 1.22<br>[0.99-1.51]                  | 1.27<br>[0.92-1.75] |
| <b>Industry of Employment <sup>b</sup></b>    |                                     |                     |                                     |                     |                                     |                     |                                      |                     |
| Manufacturing/Construction                    | 1.16<br>[0.54-2.48]                 | 0.88<br>[0.12-6.32] | 0.65<br>[0.38-1.10]                 | 1.00<br>[0.46-2.16] | 0.78<br>[0.52-1.16]                 | 0.85<br>[0.50-1.45] | 0.81<br>[0.65-1.01]                  | 0.88<br>[0.63-1.24] |
| Retail Trade                                  | <b>3.43</b><br><b>[1.43-8.24]</b>   | 0.84<br>[0.11-6.37] | 0.92<br>[0.52-1.63]                 | 0.79<br>[0.37-1.72] | 0.69<br>[0.44-1.10]                 | 1.72<br>[0.88-3.37] | 0.94<br>[0.74-1.19]                  | 0.85<br>[0.58-1.23] |
| Finance/Information/Real Estate               | 1.22<br>[0.51-2.95]                 | 0.59<br>[0.05-6.82] | <b>0.42</b><br><b>[0.21-0.83]</b>   | 0.80<br>[0.31-2.09] | 0.80<br>[0.43-1.50]                 | 1.36<br>[0.64-2.92] | <b>0.61</b><br><b>[0.46-0.82]</b>    | 0.93<br>[0.58-1.49] |
| Educational Services                          | 1.82<br>[0.63-5.27]                 | 0.38<br>[0.03-4.49] | 0.69<br>[0.36-1.33]                 | 0.63<br>[0.26-1.50] | 0.76<br>[0.42-1.37]                 | 0.79<br>[0.34-1.83] | 0.80<br>[0.61-1.04]                  | 0.64<br>[0.41-1.01] |
| Healthcare/Social Assistance                  | 1.55<br>[0.52-4.59]                 | 2.70<br>[0.42-17.2] | 0.69<br>[0.41-1.16]                 | 0.86<br>[0.42-1.73] | 1.06<br>[0.72-1.57]                 | 1.07<br>[0.53-2.19] | <b>0.79</b><br><b>[0.63-0.99]</b>    | 1.11<br>[0.76-1.61] |
| Accommodation/Food services                   | 0.41<br>[0.16-1.08]                 | 0.38<br>[0.04-3.9]  | 0.63<br>[0.34-1.16]                 | 1.23<br>[0.55-2.74] | 0.97<br>[0.64-1.48]                 | 0.96<br>[0.53-1.74] | 1.02<br>[0.78-1.33]                  | 1.04<br>[0.68-1.58] |
| Public Administration/Arts/Other services     | 1.46<br>[0.62-3.46]                 | 0.92<br>[0.12-6.84] | <b>0.50</b><br><b>[0.29-0.87]</b>   | 0.65<br>[0.28-1.52] | 0.70<br>[0.43-1.15]                 | 1.00<br>[0.50-2.00] | <b>0.76</b><br><b>[0.60-0.96]</b>    | 0.89<br>[0.62-1.29] |
| <b>Professional/Administrative/Management</b> |                                     |                     |                                     |                     |                                     |                     |                                      |                     |
| Support services                              | NE                                  | NE                  | 1.06<br>[0.32-3.50]                 | NE                  | 1.18<br>[0.51-2.72]                 | 0.77<br>[0.15-3.88] | 1.43<br>[0.91-2.25]                  | 1.76<br>[0.81-3.83] |
| Laborers                                      | NE                                  | NE                  | 1.31<br>[0.41-4.18]                 | NE                  | 1.14<br>[0.39-3.34]                 | 0.80<br>[0.20-3.25] | 1.58<br>[1.00-2.50]                  | 1.81<br>[0.82-3.99] |
| <b>Manufacturing/Construction</b>             |                                     |                     |                                     |                     |                                     |                     |                                      |                     |
| Support services                              | 0.38<br>[0.07-1.91]                 | NE                  | 1.15<br>[0.42-3.10]                 | 0.52<br>[0.06-4.59] | 0.83<br>[0.34-1.99]                 | 3.22<br>[0.57-18.4] | 0.98<br>[0.60-1.58]                  | 2.11<br>[0.97-4.56] |
| Laborers                                      | 0.95<br>[0.27-3.36]                 | NE                  | 1.29<br>[0.45-3.70]                 | 0.35<br>[0.05-2.69] | 0.78<br>[0.40-1.52]                 | 1.73<br>[0.35-8.54] | 1.13<br>[0.76-1.68]                  | 1.79<br>[0.99-3.26] |
| <b>Retail Trade</b>                           |                                     |                     |                                     |                     |                                     |                     |                                      |                     |
| Support services                              | NE                                  | NE                  | 1.03<br>[0.19-5.51]                 | NE                  | 1.52<br>[0.18-12.9]                 | 0.29<br>[0.05-1.58] | 1.61<br>[0.74-3.50]                  | 0.80<br>[0.23-2.84] |
| Laborers                                      | NE                                  | NE                  | 1.21<br>[0.20-7.22]                 | NE                  | 2.58<br>[0.29-22.9]                 | 0.44<br>[0.06-2.95] | 1.53<br>[0.63-3.71]                  | 0.93<br>[0.22-4.00] |

|                                           |                     |    |                     |    |                     |                     |                     |                                   |
|-------------------------------------------|---------------------|----|---------------------|----|---------------------|---------------------|---------------------|-----------------------------------|
| Finance/Information/Real Estate           |                     |    |                     |    |                     |                     |                     |                                   |
| Support services                          | NE                  | NE | NE                  | NE | 1.86<br>[0.66-5.28] | NE                  | 0.93<br>[0.55-1.55] | 0.64<br>[0.31-1.35]               |
| Laborers                                  | NE                  | NE | NE                  | NE | 2.26<br>[0.61-8.43] | NE                  | 0.73<br>[0.27-1.99] | 0.81<br>[0.26-2.53]               |
| Educational Services                      |                     |    |                     |    |                     |                     |                     |                                   |
| Support services                          | NE                  | NE | 6.34<br>[0.78-51.8] | NE | 0.60<br>[0.12-3.02] | NE                  | 1.34<br>[0.66-2.72] | 0.74<br>[0.22-2.52]               |
| Laborers                                  | NE                  | NE | 6.70<br>[0.73-61.9] | NE | 0.29<br>[0.05-1.83] | NE                  | 1.01<br>[0.45-2.30] | 1.44<br>[0.36-5.73]               |
| Health Care/Social Assistance             |                     |    |                     |    |                     |                     |                     |                                   |
| Support services                          | NE                  | NE | 1.68<br>[0.41-6.84] | NE | 2.03<br>[0.69-5.94] | NE                  | 1.20<br>[0.60-2.42] | <b>3.86</b><br><b>[1.16-12.8]</b> |
| Laborers                                  | NE                  | NE | 1.39<br>[0.30-6.48] | NE | 1.14<br>[0.27-4.83] | NE                  | 1.44<br>[0.62-3.32] | 2.47<br>[0.59-10.3]               |
| Accommodation/Food Services               |                     |    |                     |    |                     |                     |                     |                                   |
| Support services                          | NE                  | NE | 1.45<br>[0.30-6.92] | NE | 0.71<br>[0.17-2.89] | 0.41<br>[0.03-5.31] | 1.42<br>[0.71-2.82] | 2.73<br>[0.56-13.4]               |
| Laborers                                  | NE                  | NE | 2.12<br>[0.53-8.47] | NE | 1.32<br>[0.47-3.69] | 0.46<br>[0.04-4.98] | 1.28<br>[0.70-2.33] | 3.07<br>[0.66-14.2]               |
| Public Administration/Arts/Other Services |                     |    |                     |    |                     |                     |                     |                                   |
| Support services                          | 0.97<br>[0.32-2.92] | NE | 1.30<br>[0.49-3.49] | NE | 1.10<br>[0.27-4.52] | 0.59<br>[0.05-6.57] | 1.26<br>[0.77-2.07] | 1.16<br>[0.46-2.92]               |
| Laborers                                  | 2.72<br>[0.65-11.3] | NE | 0.74<br>[0.21-2.60] | NE | 1.65<br>[0.38-7.18] | 0.84<br>[0.07-9.98] | 1.30<br>[0.74-2.27] | 0.43<br>[0.14-1.28]               |

<sup>a</sup>Reference group: professional/management positions

<sup>b</sup>Reference group: professional/administrative/management industry

Abbreviations: NH=non-Hispanic; NE=not estimable

All models adjusted for age (18-30, 31-49, ≥50 years), gender (Women, Men), educational attainment (<high school, high school graduate, some college, ≥college), annual household income (<\$35,000, \$35,000-\$74,999, \$75,000+), region of residence (Northeast, Midwest, South, West), marital/co-habiting status (married/living with partner or cohabitating, divorced/widowed/separated, single/no live-in partner), health status (excellent/very good, good, fair/poor), alcohol consumption (never, former, current), and “ideal” cardiovascular health (never smoking/quit >12 months prior to interview, BMI 18.5-<25 kg/m, meeting physical activity guidelines, and no prior diagnosis of dyslipidemia, hypertension, or diabetes/prediabetes).

All estimates are weighted for the survey’s complex sampling design. Boldface indicates statistically significant results at the 0.05 level

Overall models adjusted for race/ethnicity (NH-White, NH-Black, Hispanic/Latinx, and Asian).
